# Supplementary material for: Preparation of Cu2O nanocubes with different sizes and rough surfaces by a seed-mediated self-assembly process and their application as a non-enzymatic glucose sensor
Source: Royal Society of Chemistry journal article supplement (doi:10.1039/d0nj02763d), 2020-01-01
Supplement: d0nj02763d1.pdf [file d0nj02763d1.pdf]

## Supplementary Information

Preparation of Cu<sub>2</sub>O Nanocubes with Different Sizes and Rough Surfaces by Seed-mediated Self-assembly Process and Its Application as a Non-Enzymatic Glucose Sensor

Wenbin Liu<sup>a</sup>, Guochun Chai<sup>a</sup>, Jian Zhang<sup>a</sup>, Mingguang Wang<sup>a,\*</sup>, Yuxiang Dai<sup>a</sup>, Yang Qi<sup>a,\*</sup>

<sup>a</sup>School of Materials Science and Engineering, Northeastern University, Shenyang, Liaoning 110819, China.

\*Corresponding authors: Mingguang Wang, wangmg@imp.neu.edu.cn. Yang Qi, Tel.: +86-024-83683674, [qiyang@imp.neu.edu.cn](mailto:qiyang@imp.neu.edu.cn).

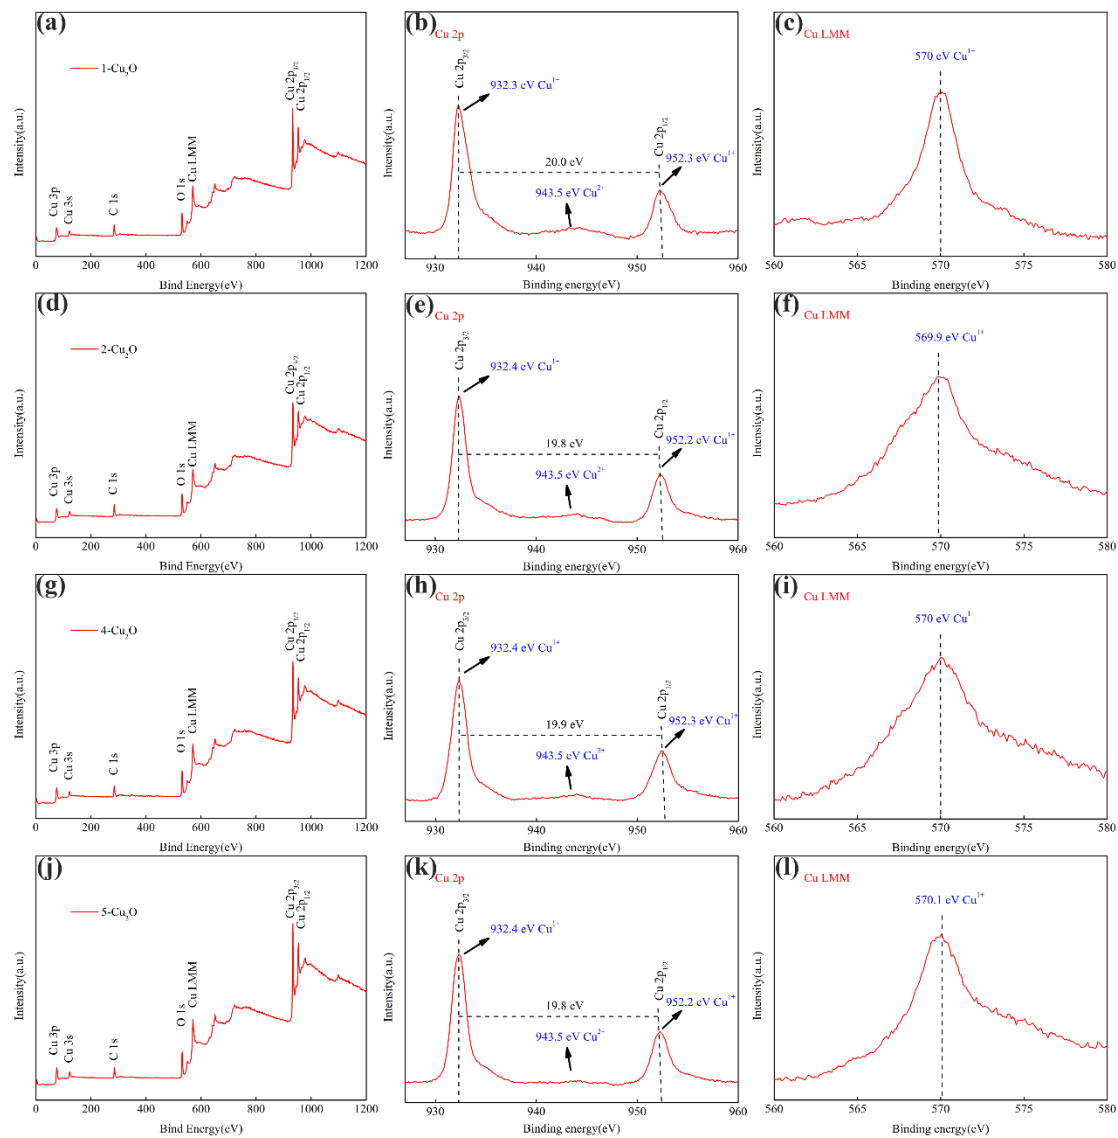

Fig. S1 Survey spectrum (a), Cu 2p spectrum (b) and Auger electron spectrum (c) of 1- $\text{Cu}_2\text{O}$ . Survey spectrum (d), Cu 2p spectrum (e) and Auger electron spectrum (f) of 2- $\text{Cu}_2\text{O}$ . Survey spectrum (g), Cu 2p spectrum (h) and Auger electron spectrum (i) of 4- $\text{Cu}_2\text{O}$ . Survey spectrum (j), Cu 2p spectrum (k) and Auger electron spectrum (l) of 5- $\text{Cu}_2\text{O}$ .

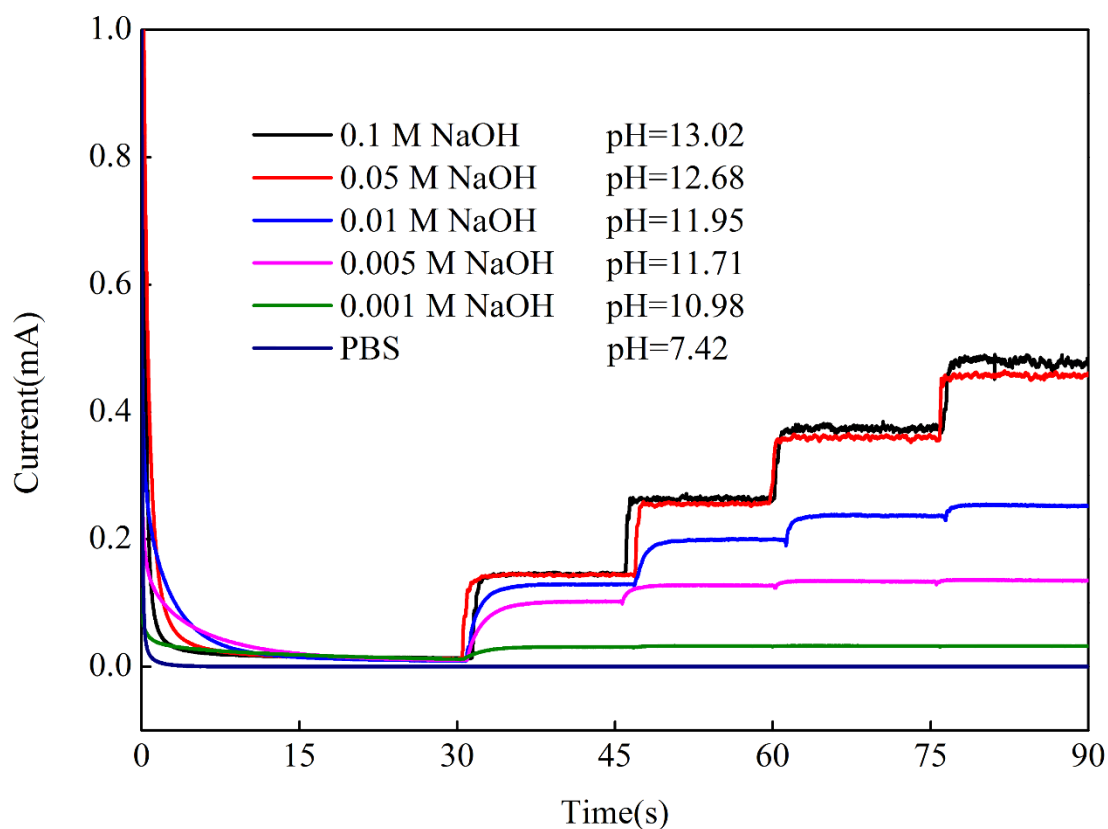

Fig. S2 CA curves of 3-Cu<sub>2</sub>O modified electrodes at different pHs.

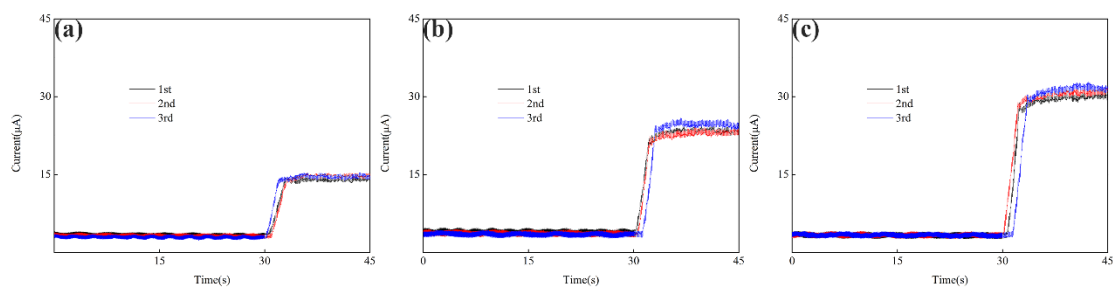

Fig. S3 CA curves of 3-Cu<sub>2</sub>O modified electrode in the human serum samples.

Table S1 All the test results of 3-Cu<sub>2</sub>O modified electrode in the human serum samples.

| Sample | Commercial equipment (mM) | 1st measure by 3-Cu <sub>2</sub> O, (mM) | 2nd measure by 3-Cu <sub>2</sub> O (mM) | 3rd measure by 3-Cu <sub>2</sub> O (mM) | Average (n=3) | RSD (% , n=3) |
|--------|---------------------------|------------------------------------------|-----------------------------------------|-----------------------------------------|---------------|---------------|
| 1      | 3.25                      | 3.29                                     | 3.12                                    | 3.25                                    | 3.22          | 2.76          |
| 2      | 5.34                      | 5.51                                     | 5.36                                    | 5.06                                    | 5.31          | 3.52          |
| 3      | 6.87                      | 6.72                                     | 7.11                                    | 6.56                                    | 6.80          | 4.16          |

RSD: relative standard deviation
